1 **Title: Discovery of tREP-18, a novel class of tRNA encoded peptide**  
2 **with potent leishmanicidal activity**

3 **Authors:** Amrita Chakrabarti<sup>1,5</sup>, Monika Kaushik<sup>2</sup>, Juveria Khan<sup>2</sup>, Deepanshu Soota<sup>3</sup>, Kalairasan  
4 P<sup>2</sup>, Sunil Saini<sup>4</sup>, Siddharth Manvati<sup>2</sup>, Jhalak Singhal<sup>1</sup>, Anand Ranganathan<sup>1</sup>, Soumya Pati<sup>5\*</sup>, Pawan  
5 K. Dhar<sup>2\*</sup>, Shailja Singh<sup>1\*</sup>

6  
7 **Affiliations:**

8 <sup>1</sup>Signaling Biology lab, Special Centre for Molecular Medicine, Jawaharlal Nehru University, New  
9 Delhi, India 110067

10 <sup>2</sup>Synthetic Biology lab, School of Biotechnology, Jawaharlal Nehru University, New Delhi, India  
11 110067

12 <sup>3</sup>National Centre for Biological Sciences, Bangalore, India

13 <sup>4</sup> Department of Life Sciences, Shiv Nadar University, Greater Noida UP, India 201 314

14 \*Correspondence to:

15 **Dr. Soumya Pati**

16 Assistant Professor

17 Department of Life Sciences, School of Natural Sciences

18 Shiv Nadar University, Greater Noida

19 soumya.pati@snu.edu.in

20 **Dr. Shailja Singh**

21 Associate Professor, Special Centre for Molecular Medicine

22 Jawaharlal Nehru University, New Delhi India 110067

23 Email: shailjasingh@mail.jnu.ac.in cell: 0091 9868 512 025

24 **Dr. Pawan K. Dhar**

25 Professor, School of Biotechnology

26 Jawaharlal Nehru University, New Delhi India 110067

27 Email: pawandhar@mail.jnu.ac.in cell: 0091 9953 345 001

28 **Abstract:**

29 In the post genomic era, tRNA-derived fragments have emerged as a new class of non-coding gene  
30 regulators, those play crucial roles both at the transcriptional and translational levels, in different  
31 cellular biogenesis. However, none of the studies has ever asked whether tRNAs can also be  
32 translated into peptides with any biological significance. Thus, we present a novel hypothesis  
33 which suggested that; design and synthesis of tRNA-derived peptides from prokaryotic genome  
34 can be exploited for developing unique chemotherapeutics against neglected tropical diseases, like  
35 Visceral leishmaniasis (VL) and its aggressive form known as post kalazar dermal leishmaniasis  
36 (PKDL). To achieve this aim, we have used a novel system biology-based strategy, which  
37 involved; i) *mining of unique tRNAs from E. coli genome and their translation into peptide in*  
38 *silico*, ii) *designing of theoretical 3D models to evaluate their stability*, iii) *prediction of their*  
39 *biological activity by screening against anti-parasitic database to filter the lead peptide*. Based on  
40 this strategy, a unique tRNA-derived peptide (**tREP-18**) was selected, chemically synthesized, and  
41 used *in vitro* for elucidating its therapeutic significance against *L. donovani*, a causative agent of

42 VL and PKDL. Our findings demonstrated that, **tREP-18** can impose high level toxicity to *L.*  
43 *donovani* promastigotes, by disrupting the ultrastructural cellular architect, destabilizing the  
44 mitochondrial membrane potential ( $\Delta\Psi_m$ ), thus leading to drastic reduction in cell viability and  
45 proliferation. It also imparted high level of toxicity to BS12 a clinical isolate of PKDL.  
46 Conceivably, we for the first time reports a novel tRNA-derived peptide “**tREP18**” with excellent  
47 anti-leishmanial property, which can be further utilized for developing it as antileishmanial drug.

48

#### 49 **One Sentence Summary:**

50 Here we report a novel first-in-class tRNA encoded peptide and its super anti-leishmanial  
51 characteristics.

#### 52 **Introduction**

53 Transfer RNAs (tRNAs) are small non-coding RNAs (76-90 nucleotides in length) pivotal in  
54 bridging the DNA and the protein space<sup>1</sup>. By ferrying amino acids to the ribosomal interface, they  
55 bond amino acids in a specific sequence resulting in the formation of a polypeptide. Though well  
56 characterized and studied, the origin, evolution and translation of tRNA are still open questions  
57 which remain unanswered. Models have been proposed to imply direct duplication and evolution  
58 of RNA hairpin encoding gene<sup>2</sup> and co-evolution of primordial tRNA with their association to  
59 translation machinery<sup>3</sup>. Furthermore, disrupted tRNA genes have been reported in the form of  
60 intron-containing tRNA<sup>4</sup>, split tRNA<sup>5 6</sup>, permuted tRNA in archae<sup>7</sup>. Evolutionary reasons behind  
61 these unexpected forms of tRNA gene sequences are still unclear<sup>8</sup>. Furthermore, asymmetric  
62 combinations of tRNA halves have been postulated to generate tRNA diversity<sup>9</sup>. Recent evidences  
63 showed that tRNA-derived small RNAs (tsRNAs) are generated following cleavage at specific  
64 sites by distinct nucleases. These tsRNAs have demonstrated multiple biological functions

65 including stress-mediated signaling and as regulation of gene expression<sup>10</sup>. Additionally, they have  
66 been involved in RNA processing, cell proliferation, translation suppression, modulation of DNA  
67 damage response. These tsRNAs have also shown specific disease associations, including  
68 infectious diseases and metabolic abnormalities and neurodegeneration<sup>10</sup>.

69 However, no study has ever exploited the translation of tRNAs and/or the biological significance  
70 of tRNA-derived peptides. To address these unsolved puzzles, and exploit their therapeutic  
71 implication, we decided to design novel tRNA-based peptides and screen the same against visceral  
72 leishmaniasis (VL) the second largest neglected tropical diseases, endemic in several parts of the  
73 tropics, subtropics of Asia and Africa, and southern Europe, as reported by WHO  
74 (<http://www.who.int/leishmaniasis/en/>. 2018.) This disease is caused by the species of protozoan  
75 obligate parasite, genus *Leishmania* (Kinetoplastida, Trypanosomatidae) which is usually  
76 anthroponotic in origin and transmitted by the bite of female phlebotomine sand flies.  
77 Leishmaniasis is exhibited in several forms among which the lethal ones are visceral and cutaneous  
78 one. Visceral Leishmaniasis (VL) is commonly known as Kala-azar, caused by the members of  
79 *Leishmania donovani*, and is prevalent in specific parts of India, Sudan and Nepal. About 3 million  
80 people are within the risk zone of infection and ~200,000 to 400,000 new cases are reported each  
81 year. (<http://www.who.int/leishmaniasis/en/>) Among those patients who are apparently cured of  
82 Visceral Leishmaniasis (VL), can fall as prey to the hands of Post Kala-azar Dermal Leishmaniasis  
83 (PKDL). These patients are the strongest contender for being the disease reservoir. PKDL can  
84 manifest as life-threatening and/or disfiguring lesions ranging from innocuous self-healing  
85 cutaneous lesions to fatal visceralization of organs or dermal dissemination<sup>11</sup>. Thus, we have  
86 established a novel combinatorial approach involving *in-silico* analysis tools and synthetic biology  
87 application to characterize prokaryotic tRNA variants from mg1655 strain of *E.coli*. Based on *in*

88 *silico* biology and structural analyses, we finally synthesized **tREP18**, as the lead peptide  
89 following screening against anti-parasitic database. Experimental evaluation revealed that,  
90 **tREP18** can cause sever morphological aberrations, destroy the membrane topology, distort  $\Delta\Psi_m$ ,  
91 leading to complete abrogation cell viability and proliferation, and highly toxic to the BS12, an  
92 Indian clinical strain representing PKDL. This work reports a novel tRNA-derived peptide with  
93 enormous anti-leishmanial attribute.

94

## 95 **Results:**

### 96 **System biology-based analysis revealed tREP18 as a novel anti-parasitic peptide**

97 We retrieved a total of 89 t-RNAs which were decoded from standard amino acids present in  
98 mg1655 strain of E. coli using Genomic t-RNA database. Out of this list, 29 peptides didn't have  
99 any stop codons, thus considered for structure-based prediction. All the peptide sequences were  
100 successfully modelled, and total energy was calculated after energy minimization (Supp. Table 1).  
101 Out of 29, 9 peptides were filtered based on total energy with E-value, < 25, (selection criterion I,  
102 Fig 1) and considered for further analysis. The screening against the anti-parasite peptide databases  
103 exposed two peptides out of 9 with total energy E-value lower than 2 (selection criterion 2, Fig 1b  
104 Table 1). Among these two peptides, **tREP18** was selected as the lead compound due to its shorter  
105 length and E value 1.9 against antiparasitic database (Fig 1b Table 1, selection criterion 3). The  
106 scrambled peptides against the t-RNA-20 was modelled with two mutations in the sequence which  
107 leads to loss of secondary structure (Fig 1c).

108 ***In silico* membrane binding studies suggested possibility of tREP18 binding to promastigotes**  
109 **surface**

110 Using Orientations of Proteins in Membranes (OPM) database, we evaluated the binding efficiency  
111 of peptide to the membrane of promastigotes *in-silico*. Our results clearly indicated that the peptide  
112 is binding with relatively high affinity as evident by the  $\Delta G$  energy score = - 3.5 kcal/Mol, and it  
113 is embedded into the virtual membrane with a depth of 4.2 Å. The membrane binding affinity of  
114 the peptide is found to be moderate, given the minimum depth/hydrophobic thickness in Å. There  
115 are 4 residues which are specifically involved in the binding, constituting alanine at 1<sup>st</sup>, 3<sup>rd</sup> and 4<sup>th</sup>  
116 position; serine at 2<sup>nd</sup> position (Fig 1d).

### 117 **tREP18 is highly cytotoxic and induces cell death in promastigotes**

118 To evaluate the cytotoxic effects of the synthetic peptide on *L. donovani* promastigotes, Lactate  
119 Dehydrogenase Assay (LDH assay) was performed. This assay involves reduction of tetrazolium  
120 salts to formazan during LDH-mediated catalysis of lactate to pyruvate, which can be detected at  
121 490 nm. Rate of formazan formation is proportional to the release of LDH through damaged cell  
122 membranes, which thereby directly correlated with the percentage of dead cells<sup>12</sup>. The  
123 promastigotes were incubated with the peptide at various concentrations (1-40 nM) for a period  
124 for 24 h, 48 h and 72 h and the released LDH was estimated (Figure 2a). IC<sub>50</sub> of **tREP18** is  
125 22.13nM and the CC<sub>50</sub> value for the same was found be 310µM and 275µM for HepG2 and  
126 J774.2a cells respectively (Supplementary Table 2). Thus, we have used approx. double the  
127 concentration of IC<sub>50</sub> (40nM) of **tREP18** for all experiments *in vitro*. Amphotericin B treated  
128 promastigotes were taken as positive control. The increment in the level of LDH release was  
129 observed in both dose and time dependent manner respectively for **tREP18** treatment (Fig 2b).  
130 The maximum LDH release was observed in 72 h in amphotericin B treated promastigotes (Avg.  
131 O.D. 0.946) representing 100% cytotoxicity. It was observed that the **tREP18** was able to induce  
132 the highest level of cytotoxicity (up to 87.86%) at 40nM in comparison to LDH release at 48 h and

133 24h, which showed 70.27% and 62.21% respectively. Whereas, the scrambled peptide treated  
134 samples showed hardly 24.41% cytotoxicity at 72h, thus used as a negative control for further  
135 experimental analyses. This result strongly suggests that **tREP18** lead to high level of cytotoxicity  
136 as correlated by LDH release. Further to corroborate whether the LDH-based cytotoxicity can be  
137 linked to the loss of membrane integrity and cell death, we have monitored propidium iodide (PI)  
138 staining in **tREP18**-treated promastigotes [Fig 2c (i)]. The result demonstrated enhancement in PI  
139 positivity in a concentration dependent manner, with 95.5% PI positivity upon treatment with  
140 40nM of **tREP18**. This was found to be closer to the level of cytotoxicity induced by Amphotericin  
141 B treatment in promastigotes (positive control) showing 97.6% of PI<sup>POS</sup> cells.

#### 142 **tREP18 caused topographical and morphological alterations in promastigotes**

143 We investigated the morphological and ultrastructural aberrations of the promastigotes following  
144 treatment with **tREP18** peptide at 30nM and 40nM respectively using two high-resolution  
145 microscopic techniques: scanning electron microscopy (SEM) and atomic force microscopy  
146 (AFM). SEM images clearly revealed that at maximum dose of 40nM, the promastigotes lost their  
147 self-interacting capability due to rupturing of membrane structure as compared to that of untreated  
148 parasites which showed no structural alterations (Fig 3a). Further to understand the ultra-  
149 cytoskeletal architecture of cellular phenotype, AFM was employed following treatment with  
150 **tREP18** for 72h. Phase scan as well as topographical view of parasites (Fig 3bi) showed profound  
151 morphological modulations when treated with 30nM and 40nM concentrations of lead  
152 peptide respectively. Analysis of distinctive parameters such as cell length, width and surface  
153 roughness prove to be the strong indicators of morphometric integrity. The untreated promastigotes  
154 showed typical healthy signatures like elongated spindle-shaped promastigotes with an anterior  
155 and long flagellum. Whereas, peptide treated promastigotes demonstrated perturbed membrane,

156 constricted cellular structures and shortened flagella. Ratio of width/length was seen to be lower  
157 in untreated control parasites denoting elongated intact structures, whereas **tREP18** treated  
158 parasites demonstrated prominently higher width to length ratio suggestive of profound distortion  
159 in morphology. Further to determine cell surface roughness, we have estimated the Root Mean  
160 Square (RMS value) which is a specific quantitative index to evaluate cell surface topology<sup>13</sup>. The  
161 data showed doubling of RMS value (Rq) in treated promastigotes as compared to control ones.  
162 Overall, **tREP18** treatment could impose significant alteration in cytoskeletal architecture and  
163 surface topology.

#### 164 **tREP18 interferes with mitochondrial function and disrupts mitochondrial membrane** 165 **potential ( $\Delta\Psi_m$ )**

166 To explore the effect of **tREP18** on  $\Delta\Psi_m$  of promastigotes, we have used a lipophilic, cationic  
167 dye (JC-1) exhibiting green fluorescence, which enters the mitochondria and gets accumulated into  
168 a reversible complex known as J aggregates emitting red fluorescence. The fluorescence intensity  
169 was evaluated using flowcytometric analysis and fluorescence microscopy. Thus, the red  
170 (PE)/green (FITC) fluorescence ratio of JC-1 in the mitochondria can be considered as a direct  
171 assessment of the mitochondria membrane polarization. Enhanced level of red fluorescence  
172 denotes more J aggregate formation due to higher  $\Delta\Psi_m$ , whereas shifting towards lower red or  
173 accumulation of higher green fluorescence implies a strong indication of destabilized  $\Delta\Psi_m$ . Thus,  
174 in healthy untreated promastigotes, an intense PE/FITC ratio corresponding to a higher red to green  
175 ratio (0.87) was detected representing hyperpolarised mitochondrion, thus suggesting stable  $\Delta\Psi_m$   
176 (Fig. 4 ai, ii c). However, in case of **tREP18** treated promastigotes, drastic reduction in  $\Delta\Psi_m$  could  
177 be detected with an increasing order of peptide treatment with the maximum effect observed at  
178 40nM, manifested as poor red/green ratio (0.001) exactly similar to amphotericin B treatment (Fig.



179 4a-ii, c). Based on this result we hypothesize that the disruption of membrane structure lead to  
180 compromised  $\Delta\Psi_m$  on **tREP18** treatment affecting the cellular viability of promastigotes.

### 181 **tREP18 affects the growth kinetics and inhibits proliferation of promastigotes**

182 In order to study the impact of **tREP18** on growth dynamics of promastigotes, their replication in  
183 culture was monitored for a period of 0-72 h at different treatment conditions (Fig 5a). Parasite  
184 density was measured every 24 hours by staining with trypan blue and counting was done in a  
185 haemocytometer chamber. An exponential growth curve was observed for untreated cells, while a  
186 decreasing pattern of cell growth was evident at 24hours following treatment with increasing  
187 concentrations of **tREP18**, including 4nM, 20nM and 30nM respectively. At 72 hours there was  
188 91% decrease in the number of promastigotes in presence of 40nM of **tREP18**, similar to reduction  
189 in growth pattern by Amphotericin B treatment, which was used as a positive control (Fig 5a).

190 To further validate our findings, we assessed the proliferation of promastigotes by quantifying the  
191 release of cell permeable dye, CFDA-SE during cell division. This dye enters cells by simple  
192 diffusion, following cleavage by intracellular esterase enzymes, to form reactive amine products.  
193 Which covalently binds to intracellular lysine residues and other amine sources, producing  
194 detectable fluorescence. Decrease in fluorescence intensity is proportional to generation of  
195 promastigote daughter cells. The results indicated that, at 40nM concentration of the peptide the  
196 percentage of CFDA positive cells were almost remained unchanged at both 24 h (97.3%) and 48  
197 h (96.1%) suggesting no division of the parental cells and indicating no such multiplication in  
198 promastigotes number consecutively, as compared to lower concentrations<sup>14</sup>. However, the  
199 untreated promastigotes displayed 98.4% of CFDA positivity at 0h, which ultimately reduced to  
200 54.4% at 24 h and 23.2% at 48 h, suggesting cellular progression in a time dependent manner(Fig

201 5 bi, ii). Taken together, our results demonstrated a significant reduction in promastigotes growth  
202 and number on treatment with **tREP18** in a dose dependent manner.

### 203 **tREP18 inflicts cytotoxicity in PKDL strain BS12**

204 We further evaluated the effect the **tREP18** and its scrambled control on the clinical isolate of  
205 PKDL strain, BS12 of *Leishmania* sp. The results showed pronounced toxic effect of the  
206 **tREP18** on the Indian origin leishmania isolate of PKDL. As mentioned previously, LDH assay  
207 was carried out on promastigotes treated with different concentrations of **tREP18** for 72 h, while  
208 amphotericin B was used a positive control and scrambled peptide served as negative control. The  
209 promastigotes showed minimal toxicity at 1nM with 42% parasitic death and maximum toxicity  
210 at 40nM with 98% of cell death like that of amphotericin B treatment (Fig. 6). While, the scrambled  
211 peptide showed no toxic effect at all. The data strongly suggests that **tREP18** could adversely  
212 affect the metabolic cell viability of clinical strain of PKDL.

### 213 **Discussion:**

214 tRNA is an evolutionary invention of non-coding part of genome that needs to be exploited to  
215 understand its potential in cellular biogenesis. We hypothesize that, a successful co-ordination  
216 between tRNA identification and their translation can lead to birth of novel biomolecular pathways  
217 involved in cellular homeostasis. However, the coding potential of tRNA and its possible impact  
218 on cell physiology has not been explored yet. Thus, we have addressed the unsolved queries  
219 associated with tRNAs involving its possible translation into peptide-like structures and their  
220 potential role in biological activities, especially their possible role in targeting eukaryotic  
221 pathogen-derived disease, like Leishmaniasis one of the fatal neglected tropical diseases.

222 To achieve this aim, we have chosen a total of 87 tRNA gene sequences from Escherichia coli  
223 genome (mg1655) and translated *in silico* into corresponding peptide sequence. These peptide  
224 sequences were chemically synthesized and further used for studying their possible biological  
225 functions *in vitro*. Prior to their cellular administration, we have theoretically modelled 3D  
226 structures of the peptides, those were energy minimized to identify the most stable ones. The  
227 results revealed 9 peptides out of 25 were filtered as the most stable candidate peptides based on e  
228 -value <25. Further, only two peptides showed E-value < 2, following in silico screening against  
229 anti-parasitic diseases. Out of these two candidates “**tREP18**” with lowest length of 24 mer was  
230 considered as the lead peptide, as it is assumed that with lowest length the propensity of proteolytic  
231 cleavage lowers down in its cellular targeting. And, with narrow-spectrum activity, **tREP18** might  
232 impose no resistance potential along with high selectivity. With these structural attributes, **tREP18**  
233 was further used for all experimental studies to evaluate its effect on promastigote form of *L.*  
234 *donovani*. Henceforth, to validate the structural stability and functional importance of **tREP18**  
235 peptide, we designed and synthesized a scrambled peptide with change of aspartic acid and  
236 glutamic acid at 7<sup>th</sup> and 20<sup>th</sup> positions respectively to two prolines, which showed no effect on the  
237 promastigotes thus proved to be a negative control.

238 The cytotoxic effect of the **tREP18** on promastigotes showed a dose dependent increment, and  
239 40nM concentration was chosen as the highest dose for all other experimental evaluations, due to  
240 its similar effect as of amphotericin B treatment, that was used as a positive control. Which was  
241 also approx. double the IC50 value of **tREP18** (22.13nM) (Supplementary Table 2). We have also  
242 screened the CC50 value of **tREP18** in HepG2 and J774.2a cells, which showed nontoxic effects  
243 at concentrations > 250µM (Supplementary Table 2). With such functional characteristics,  
244 **tREP18** was targeted to *L. donovani* promastigotes to evaluate if it can impose any impact on

245 cytotoxicity in time and dose dependent manner, using lactate dehydrogenase (LDH) as an  
246 enzymatic marker of cell death. The finding suggested that **tREP18** can trigger highest release of  
247 LDH in a dose and time dependent order with maximum effect at 40nM dose like that of  
248 amphotericin B, that further confirmed the lethal effect of our peptide.

249 The LDH assay results were further corroborated with the PI staining, which also showed that  
250 tREP18 could significantly compromise the viability of promastigotes (Fig.2b). To understand if  
251 tREP18 treatment could affect the topology of promastigotes, we examined ultrastructural changes  
252 using AFM and SEM studies. The result demonstrated that **tREP18** treatment significantly altered  
253 the morphology of promastigotes with visible loss in inter-cellular networking and ruptured  
254 cellular architecture. Collectively, these results have indicated that **tREP18** induced cell death in  
255 promastigotes via severely destabilizing the cellular topology.

256 Accumulating evidences suggested that collapsed mitochondrial membrane potential is one of the  
257 initial events that can lead to cellular death<sup>15</sup>. Based on these, we hypothesized that **tREP18**  
258 treatment might lead to depolarization of mitochondrial membrane potential. To determine  
259 **tREP18** effect on  $\Delta\Psi_m$ , we have used a lipophilic cationic dye JC1 monomer that naturally emits  
260 green florescence (FITC). In case of healthy cells, due to hyperpolarized state with negatively  
261 charged mitochondrial membrane, JC1 can cross the mitochondrial membrane and gets converted  
262 to an oligomeric form of reversible J aggregate that emits detectable red fluorescence. Thus,  
263 alteration in  $\Delta\Psi_m$  can be represented as lower red/green ratio suggesting destabilization of the  
264 membrane. Our findings revealed that **tREP18** can severely

265 destroy the  $\Delta\Psi_m$  at 40nM of concentration at 72 h, which is represented by poor red/green ratio  
266 (0.001), as compared to control, distorting the redox homeostasis in the cells. It is noteworthy that,  
267 destabilization of  $\Delta\Psi_m$  can lead to generation of reactive oxygen species (ROS), a direct hallmark

268 of apoptosis (). Previous evidences also suggested that enhanced generation of ROS can lead to  
269 manifestation of DNA damage, leading to cell death. We assumed that **tREP18** led disruption of  
270  $\Delta\Psi_m$  is one of the major factors contributing in cell death of promastigotes, which is corroborated  
271 by both CFDA and PI positive cell population.

272 Next, we have evaluated whether treatment of **tREP18** on the promastigotes could also interfere  
273 with the growth kinetics of promastigotes using live staining with CFDA-SE, a strong membrane  
274 permeant dye. Upon cleavage by esterases within the cell, it generates reactive amine products  
275 those covalently bonds with intracellular lysine to make detectable fluorescence products. In case  
276 of healthy promastigotes, 98.4% of CFDA positivity could be detected, which gradually reduced  
277 to approximately 54.4% and 23% by 24h and 48h respectively, demonstrating a healthy cell  
278 division, as clearly indicated by daughter cell generation and dye distribution. Interestingly,  
279 **tREP18** treated promastigotes showed no change in dye retentivity at both 24 h (97.3%) and 48 h  
280 (96.1%) suggesting, complete abrogation of cell division or cellular progression at all. These  
281 experimental outcomes suggest at 40nM concentration **tREP1820** can demonstrate highest  
282 efficacy targeting death of *L. donovani* promastigotes.

283 Based on this background, we then tried to evaluate the efficacy of **tREP18** peptide on clinical  
284 PKDL isolate BS12, which is responsible for the post kalazar disease manifestation, and known to  
285 play crucial reservoir for *L. donovani* during interepidemic periods . PKDL can impose aggressive  
286 manifestation of VL, including devastating facial and skin lesions. Our findings revealed that,  
287 **tREP1820** can impart prominent toxic effect even at much lower concentration (1nM), and  
288 demonstrated highest toxic effect at 40nM, when kept in contact with promastigotes for a time  
289 period of 72 h. Thus, this peptide proves to be a novel therapeutic agent with high efficacy against  
290 visceral leishmaniasis caused by *L. donovani* as well as in case of PKDL.

291 In summary, our study for the first-time reports a novel tRNA-derived peptide with excellent anti-  
292 leishmanial property, which can be a potent drug candidate against VL and PKDL.

## 293 **Materials and Methods:**

### 294 **Bioinformatics based novel peptide screening**

295 We retrieved the tRNA gene sequences of Escherichia coli strain K-12 sub-strain MG1655, from  
296 the genomic tRNA database, that contained tRNA genes. A total of 87 tRNA gene sequences were  
297 retrieved and computationally translated into protein sequences using Transeq tool of European  
298 Bioinformatics Institute (EBI). Each tRNA sequence was translated into protein sequences and the  
299 sequence with stop codon were removed. Further, we computational modeled 3D structure of the  
300 peptide using Phyre server. The modeled structures were energy minimized and validated using  
301 GROMACS and PROCHECK, respectively. To filter the most stable peptide we subjected the  
302 models for FOLDX stability analysis. The stable peptides were screened against the anti-parasite  
303 and anti-cancer peptide databases. The peptide with high similarity in both the databases were  
304 considered for experimental validation. The scrambled peptide is also modeled using Phyre  
305 server.

### 306 **Parasite culturing and treatment**

307 Promastigote-form of *Leishmania donovani* (Ag83 strain) was cultured at 26 \*C in M199 media  
308 (GIBCO, India) pH 7.4 supplemented with 10% (v/v) inactivated Fetal Bovine Serum (GIBCO,  
309 India) and 0.02 mg/mL gentamycin (Life Technologies, USA). Cultures were maintained between  
310  $10^6$  and  $10^7$  cells/mL for continuous exponential growth.  $1 \times 10^6$  cells /mL parasite count was  
311 constantly maintained for all the experiments. **tREP18** peptide and scrambled peptide were  
312 resuspended in dimethyl sulphoxide (DMSO) (Sigma-Aldrich) for preparation of 1M stock

313 solution. 40nM was used as the working concentration for **tREP18** peptide (~ double the IC50  
314 value) treatment in all *in-vitro* experiments at different time intervals. Parasites without any  
315 inhibitor addition were maintained as negative controls.

### 316 **Cytotoxicity assay by LDH**

317 LDH cytotoxic assay was performed as per standard protocol (CytoTox 96 Non-Radioactive  
318 Cytotoxicity Assay-Promega, USA). Initially, promastigotes were suspended into a 96-well  
319 microtiter plate (100  $\mu$ L well volume). Parasite samples in triplicates were exposed to various  
320 concentrations (1nM-40nM) of each peptide and incubated at 26 \*C for 72 h. Parasites with  
321 Amphotericin B (2.5  $\mu$ g/mL) (Sigma-Aldrich) was maintained as the positive control. Finally,  
322 percentage cytotoxicity of **tREP18** was calculated by normalizing with Amphotericin B treatment  
323 that rendered 100% cytotoxicity. Log phase promastigotes ( $1 \times 10^6$  /mL) without any peptide  
324 addition were maintained as negative controls. Log phase promastigotes ( $1 \times 10^6$  /mL) were also  
325 treated with scrambled peptide and cytotoxicity of the peptide on parasites was evaluated for 72 h  
326 by LDH assay as described in previous experiment.

### 327 **Cellular viability and Apoptotic Assay**

328 Promastigotes undergoing apoptosis in both treated and untreated samples were measured by  
329 Propidium Iodide (PI) staining. After exposure with the peptide for 24h ,48h and 72h, respectively,  
330 cells were harvested, PBS washed and stained with PI (5  $\mu$ g/mL) (Life Technologies, USA). This  
331 was followed by incubation for a period of 20 min at 37°C. Subsequently, cells were washed for  
332 excessive stain removal and resuspended in 250  $\mu$ L PBS. Cells were further analysed through BD  
333 FACS diva and also visualized using fluorescence microscope with 510–560 nm filter block for  
334 detection of PI red fluorescence.

### 335 **Morphological study of promastigotes by Scanning Electron Microscopy**

336 Morphological distortion of **tREP18**-treated promastigotes was examined by SEM. Sample  
337 preparation for the SEM was carried out as reported by Gluenz *et. al.* 2012, with slight  
338 modification in their protocol. Cells were incubated with 40nM of **tREP1820** for 72 h at 26 °C.  
339 These promastigotes were then harvested at 1100g for 15 min at RT and following addition of  
340 fresh media. EM-grade glutaraldehyde was directly added to the cells containing M199 media to  
341 a final concentration of 2.5% glutaraldehyde (from a 25% stock of EM-grade glutaraldehyde). The  
342 cells were centrifuged for 10 mins at 800 g and the media was removed. Promastigotes were then  
343 resuspended in 0.1 M phosphate buffer (pH 7.2) and washed twice. These were further fixed with  
344 2.5% (v/v) glutaraldehyde in the same buffer for 120 mins. Glass coverslips were cleaned with  
345 ethanol, followed by immersion in a 0.1% (w/v) solution of poly-L-lysine (sigma) in water.  
346 Coverslips are then rinsed in water and left to air-dry in laminar hood. 200ul of cell suspension  
347 was added onto each coverslip ensuring the coverslip is completely covered by the cell suspension.  
348 Coverslips are placed in individual wells of a 12-well tissue culture plate. The plate is left for 10  
349 mins at room temperature for the cells to settle and adhere to the coverslips. Adherence was  
350 checked using a tissue culture microscope. Samples were then post fixated in 1% osmium tetroxide  
351 for 1 h and dehydrated by gradient acetone concentration (50–100%), 20 min each. Thereafter,  
352 samples were treated with 100% hexamethyldisilane at room temperature for 5 min and mounted  
353 on aluminium stubs with adhesive carbon tape. Prior to SEM application, a thin gold layer was  
354 coated by means of a sputter-coater (SC7640, Polaron Equipment, England, U.K.). The samples  
355 were observed under an environmental, variable pressure Scanning Electron Microscope (Carl  
356 Zeiss EV0-40, Cambridge, U.K.) at a voltage of 20 kV and a working distance of 10 mm.



357 **Study of surface topology of tREP1820-treated *L. donovani* promastigotes using Atomic**  
358 **Force Microscopy**

359 Sample preparation for the AFM analysis was carried out as per the protocol of Eaton *et al* 2013.  
360 Cells were incubated with 40nM of the peptide for 72 h at 26 °C. These promastigotes were then  
361 harvested by centrifugation at 1100g for 15 min at RT, washed with 0.1 M phosphate buffer (pH  
362 7.2) and fixed with 2.5% (v/v) glutaraldehyde in the 0.1M phosphate buffer for 60 min. Cells were  
363 washed using the phosphate buffer and overlaid onto poly-L-ornithine (Sigma) coated micro slides  
364 having dimension 10mm x10mm. Samples were then washed twice in molecular biology grade  
365 water (Sigma) and were dried in laminar hood air flow. Scanning of promastigote cells was carried  
366 out with a TT-AFM atomic force microscope. A 50  $\mu\text{m}$  scanner was used, and the instrument  
367 operation was done in tapping and non-contact mode. Image details were calculated using XEI  
368 software in 1st order flattened 20 x20  $\mu\text{m}^2$  areas in the centre of the cell body.

369 **Quantification of mitochondrial membrane potential**

370 Mitochondrial membrane ( $\Delta\psi\text{m}$ ) potential was assessed by Fluorescence Assorted Cell Sorting  
371 and fluorescence microscopy with 5,6-dichloro-2-[3-(5,6-dichloro-1,3-diethyl-1,3-dihydro-2H-  
372 benzimidazol-2-ylidene)-1propenyl]-1,3-diethyl-, iodide (JC-1) (Life Technologies, USA) as a  
373 probe. Treated groups and untreated groups were incubated for 24 h. Cells were washed with PBS,  
374 JC-1 labelled and samples were analysed through BD FACS diva. The labelled cells were also  
375 allowed to adhere to the glass slides for visualization under Fluorescence microscope; excitation  
376 and emission filters of TRITC and FITC were used.

377 **Promastigote Proliferation Assay**

378 Cell growth and multiplication was assessed by Fluorescence Assorted Cell Sorting and  
379 fluorescence microscopy with 6-Carboxyfluorescein diacetate succinimidyl ester (CFDA-SE, Life  
380 Technologies, USA) as a probe. Promastigotes were washed thrice with 0.1M PBS. The cells were  
381 labelled with CFDA-SE dye and were then incubated at 37°C for 10min during which they were  
382 mixed 3 to 4 times properly. These cells were then resuspended in ice cold M199 medium. Further  
383 they were centrifuged at 1200g for 10 mins (4°C) and resuspended in fresh medium. Cells were  
384 treated with the peptide at different concentrations and were analyzed through BD FACS DIVA  
385 for 3 consecutive replicates. The labelled cells were also allowed to adhere to glass slides for  
386 visualization under Fluorescence microscope; excitation and emission filters of FITC were used.

387

388

### 389 **Statistical analysis.**

390 Student's t-test was performed to evaluate significant differences between treatment and control  
391 samples. P-value < 0.05 was considered to be significant indicated as \*. Results represent the mean  
392 ± SD of minimum three independent experiments.

### 393 **Acknowledgments:**

394 This work was supported by funding from DBT builder program, DST, and JNU UPE II program.  
395 Dr. Shailja Singh and Dr. Anand Ranganathan are thankful for the funding support from support  
396 from Science and Engineering Research Board (SERB, File no. IPA/2020/000007) and Drug and  
397 Pharmaceuticals Research Programe (DPRP, Project No. P/569/2016-1/TDT). We sincerely  
398 acknowledge help from Prof. Madhubala Rentala, JNU for gifting the J774.A1 murine macrophage

399 cell line. We wish to warmly thank Prof. S. Chandrasegaran, Johns Hopkins University for  
400 extremely valuable feedback while reviewing the paper.

401

## 402 **Author contributions**

403 AC, MK, JK and SM performed the experiments, DS, KP and SS performed the bioinformatics  
404 study, AR, JS and AR helped in experiments, SP and SS (corresponding author) mentored and  
405 provided experimental support. PKD conceived the idea, designed the project, analysed the results  
406 and wrote major part of the publication.

## 407 **Competing Interests:**

408 The authors declare no competing interest.

## 409 **References**

- 410 1. Sharp SJ, Schaack J, Cooley L, Burke DJ, Soil D. Structure and transcription of  
411 eukaryotic tRNA gene. *Crit Rev Biochem Mol Biol*. 1985.  
412 doi:10.3109/10409238509082541
- 413 2. Di Giulio M. The origin of the tRNA molecule: Implications for the origin of protein  
414 synthesis. *J Theor Biol*. 2004. doi:10.1016/j.jtbi.2003.07.001
- 415 3. Rodin AS, Szathmáry E, Rodin SN. On origin of genetic code and tRNA before  
416 translation. *Biol Direct*. 2011. doi:10.1186/1745-6150-6-14
- 417 4. Sugahara J, Kikuta K, Fujishima K, Yachie N, Tomita M, Kanai A. Comprehensive  
418 analysis of archaeal tRNA genes reveals rapid increase of tRNA introns in the order

- 419 thermoproteales. *Mol Biol Evol.* 2008. doi:10.1093/molbev/msn216
- 420 5. Randau L, Münch R, Hohn MJ, Jahn D, Söll D. Nanoarchaeum equitans creates functional  
421 tRNAs from separate genes for their 5'- and 3'-halves. *Nature.* 2005.  
422 doi:10.1038/nature03233
- 423 6. Fujishima K, Sugahara J, Kikuta K, et al. Tri-split tRNA is a transfer RNA made from 3  
424 transcripts that provides insight into the evolution of fragmented tRNAs in archaea. *Proc*  
425 *Natl Acad Sci.* 2009. doi:10.1073/pnas.0808246106
- 426 7. Soma A, Onodera A, Sugahara J, et al. Permuted tRNA genes expressed via a circular  
427 RNA intermediate in Cyanidioschyzon merolae. *Science (80- ).* 2007.  
428 doi:10.1126/science.1145718
- 429 8. Fujishima K, Kanai A. tRNA gene diversity in the three domains of life. *Front Genet.*  
430 2014. doi:10.3389/fgene.2014.00142
- 431 9. Kanai A. Disrupted tRNA Genes and tRNA Fragments: A Perspective on tRNA Gene  
432 Evolution. *Life.* 2015. doi:10.3390/life5010321
- 433 10. Shen Y, Yu X, Zhu L, Li T, Yan Z, Guo J. Transfer RNA-derived fragments and tRNA  
434 halves: biogenesis, biological functions and their roles in diseases. *J Mol Med.* 2018.  
435 doi:10.1007/s00109-018-1693-y
- 436 11. Sengupta R, Chowdhury SJ, Moulik S, et al. Active surveillance identified a neglected  
437 burden of macular cases of Post Kala-azar Dermal Leishmaniasis in West Bengal. *PLoS*  
438 *Negl Trop Dis.* 2019. doi:10.1371/journal.pntd.0007249
- 439 12. Korhonen E, Rönkkö S, Hillebrand S, et al. Cytotoxicity assessment of porous silicon  
440 microparticles for ocular drug delivery. *Eur J Pharm Biopharm.* 2016.

441 doi:10.1016/j.ejpb.2015.11.020

442 13. Eaton P, Bittencourt CR, Costa Silva V, et al. Anti-leishmanial activity of the  
443 antimicrobial peptide DRS 01 observed in *Leishmania infantum* (syn. *Leishmania*  
444 *chagasi*) cells. *Nanomedicine Nanotechnology, Biol Med.* 2014.

445 doi:10.1016/j.nano.2013.09.003

446 14. Sivandzade F, Bhalerao A, Cucullo L. Analysis of the Mitochondrial Membrane Potential  
447 Using the Cationic JC-1 Dye as a Sensitive Fluorescent Probe. *BIO-PROTOCOL.*  
448 2019;9(1). doi:10.21769/BioProtoc.3128

449 15. Gannavaram S, Debrabant A. Programmed cell death in *Leishmania*: biochemical  
450 evidence and role in parasite infectivity. *Front Cell Infect Microbiol.* 2012.

451 doi:10.3389/fcimb.2012.00095

452

453 Figure legends:

454 **Figure 1:** (a) Structural stability analysis of the t-RNA peptides; (b) Structural comparison of  
455 tREP18 with scrambled peptide; (c) Sequence similarity analysis against peptide databases; (d)  
456 Membrane binding affinity of **tREP18** peptide.

457 **Figure 2:** (a) Percentage Inhibition was evaluated using LDH Assay for 24 h following treatments  
458 by **tREP18** and scrambled peptide, with 2.5 µg/ml of Amphotericin B was used as a positive  
459 control, and its cytotoxic effect (100%) was used for normalization.

460 (b-i) Effect of **tREP18** on promastigotes in a concentration and time dependent manner,  
461 manifested as LDH release depicting the cytotoxic effect of novel synthetic peptide; (b-ii) Effect  
462 of of scrambled peptide on promastigotes, represented via estimation of LDH release depicting the  
463 non-cytotoxic effect of the peptide; (c i) the representative screenshots of PI stained promastigotes  
464 at 72 h assessed by flow cytometry analysis depicting parasite death on peptide treatment; (c ii)  
465 percentage of PI positivity in **tREP18**-treated promastigotes at 72 h;

466 **Figure 3:** Morphological alterations of *Leishmania donovani* promastigotes following treatment  
467 with synthetic peptide, (a) Parameters demonstrating surface scanning were elucidated using  
468 Scanning Electron Microscopy, (b) parameters showing topological aberrations were depicted  
469 using Atomic Force Microscopy,

470 **Figure 4:** (a & b) Effect of **tREP18** administration on mitochondrial membrane potential ( $\Delta\Psi_m$ )  
471 of promastigotes was determined by the change in JC-1 staining using Flow cytometry and  
472 fluorescence microscopy.

473 **Figure 5:** Effect of **tREP18** treatment on promastigotes in dose dependent manner; (a-i)  
474 proliferation of daughter cells was determined by reduction in CFDA-SE staining by flow  
475 cytometry analysis; (a-ii) percentage of CFDA-SE positivity in **tREP1820**-treated promastigotes;  
476 (b) estimation of number of **tREP1820**-treated promastigotes using trypan blue dye exclusion  
477 assay.

478 **Figure 6: a)** Cytotoxic effect of **tREP18** peptide and non-toxic effect of scrambled peptide  
479 (negative control) on clinical PKDL isolate BS12 respectively.

480

Figure. 1

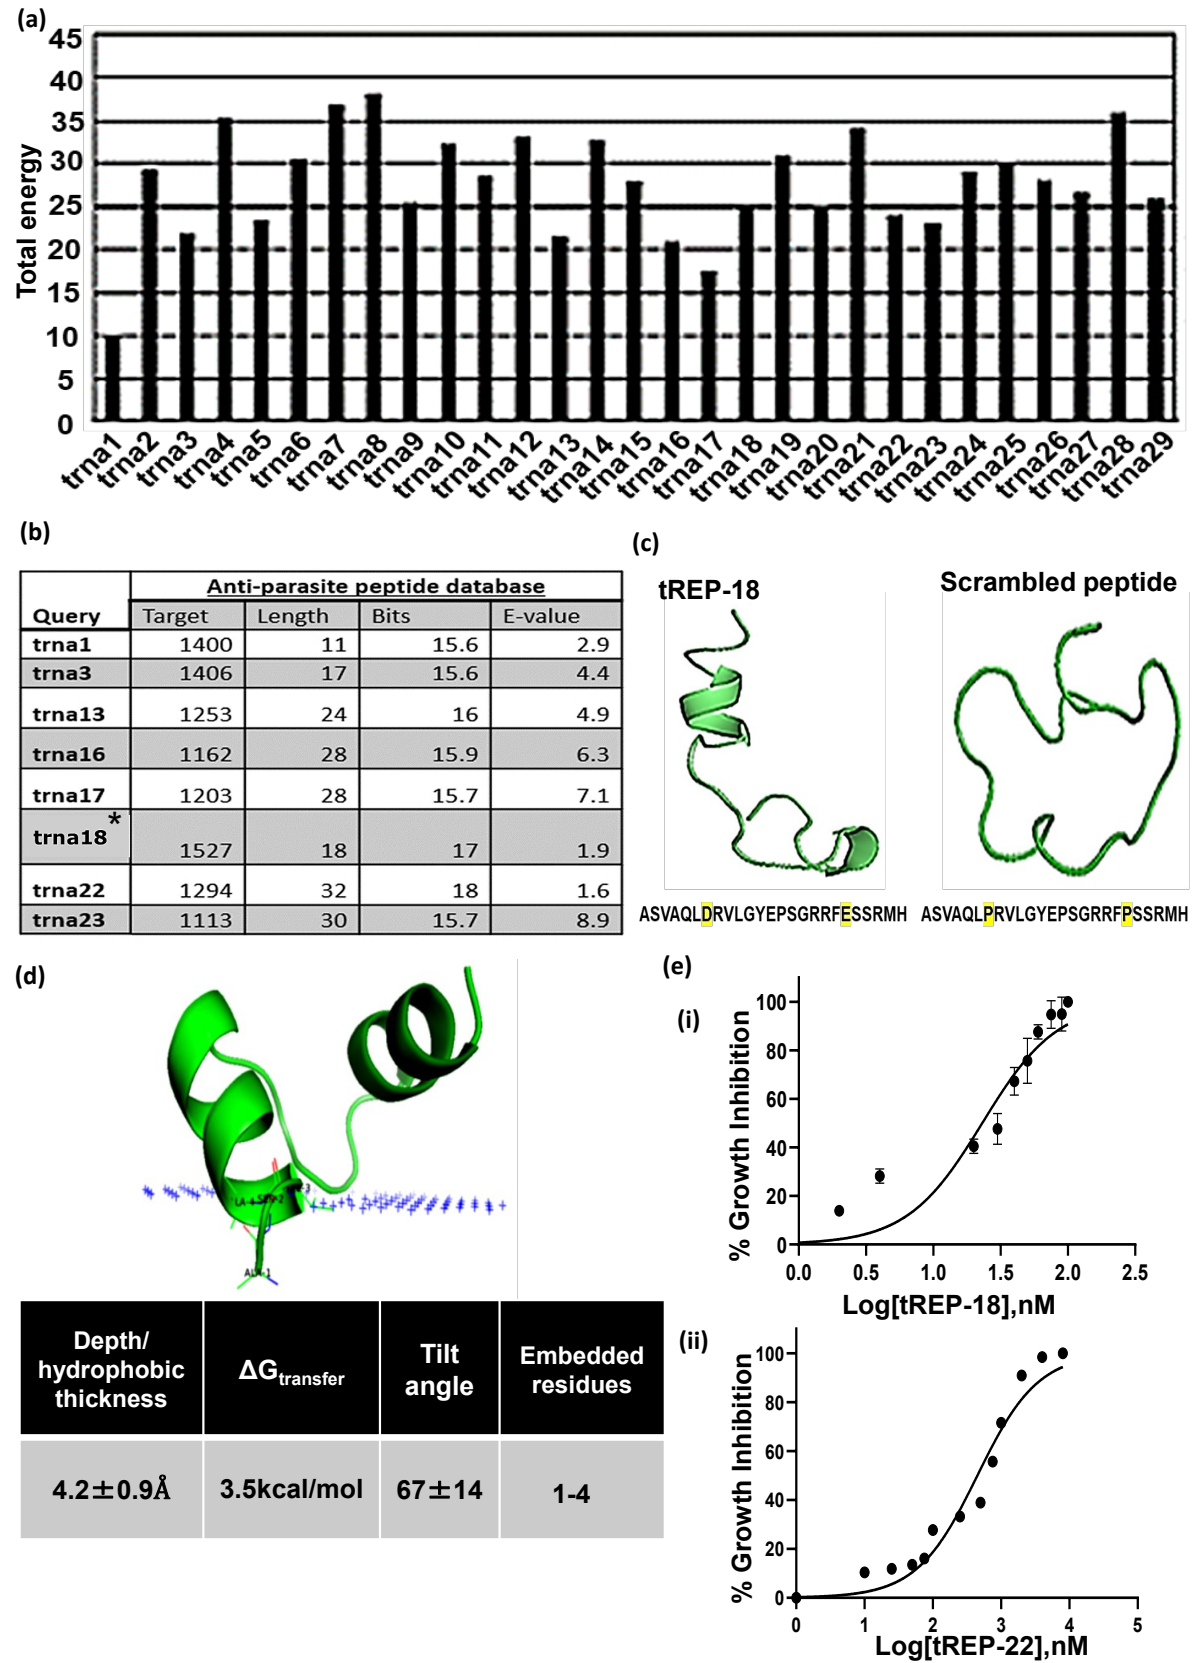

**Figure. 2**

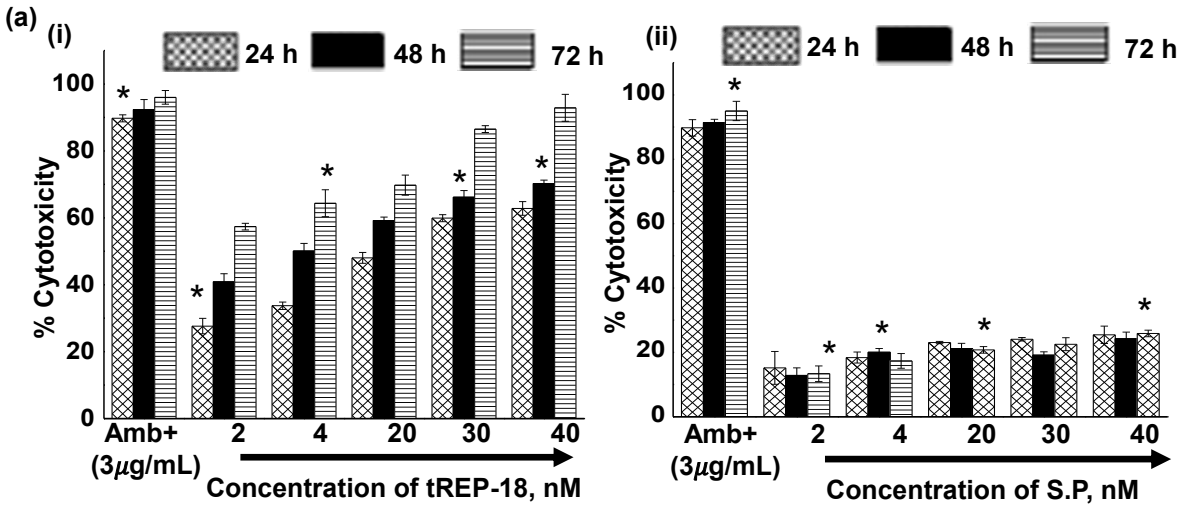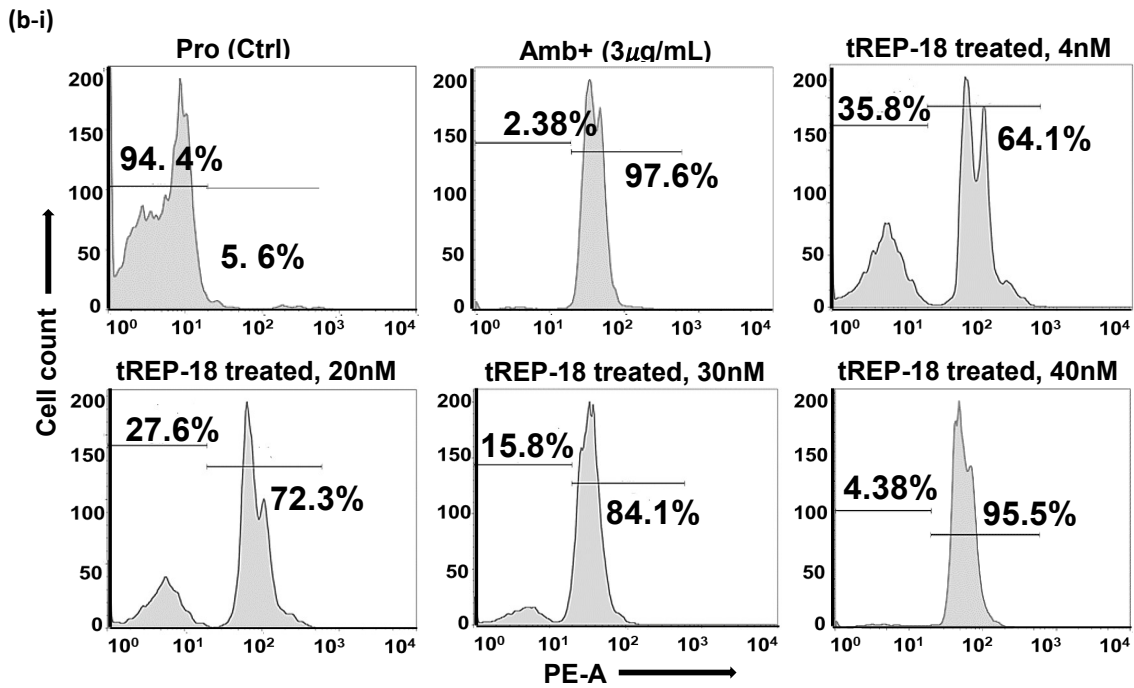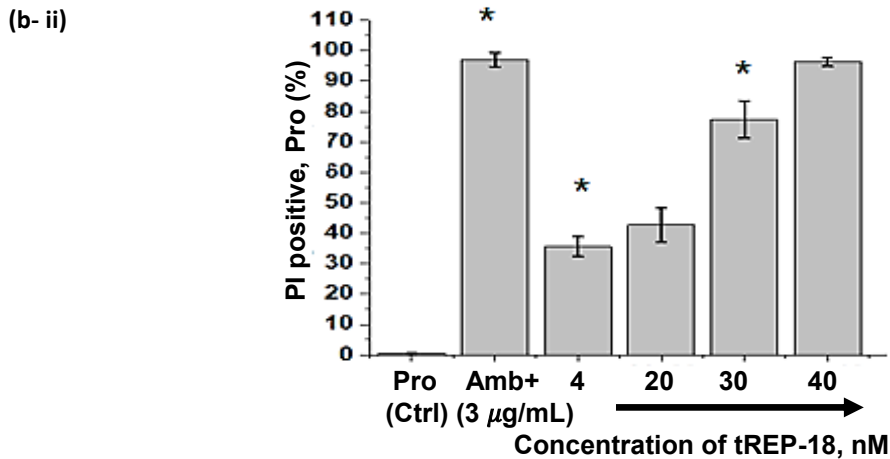



**Figure. 3**

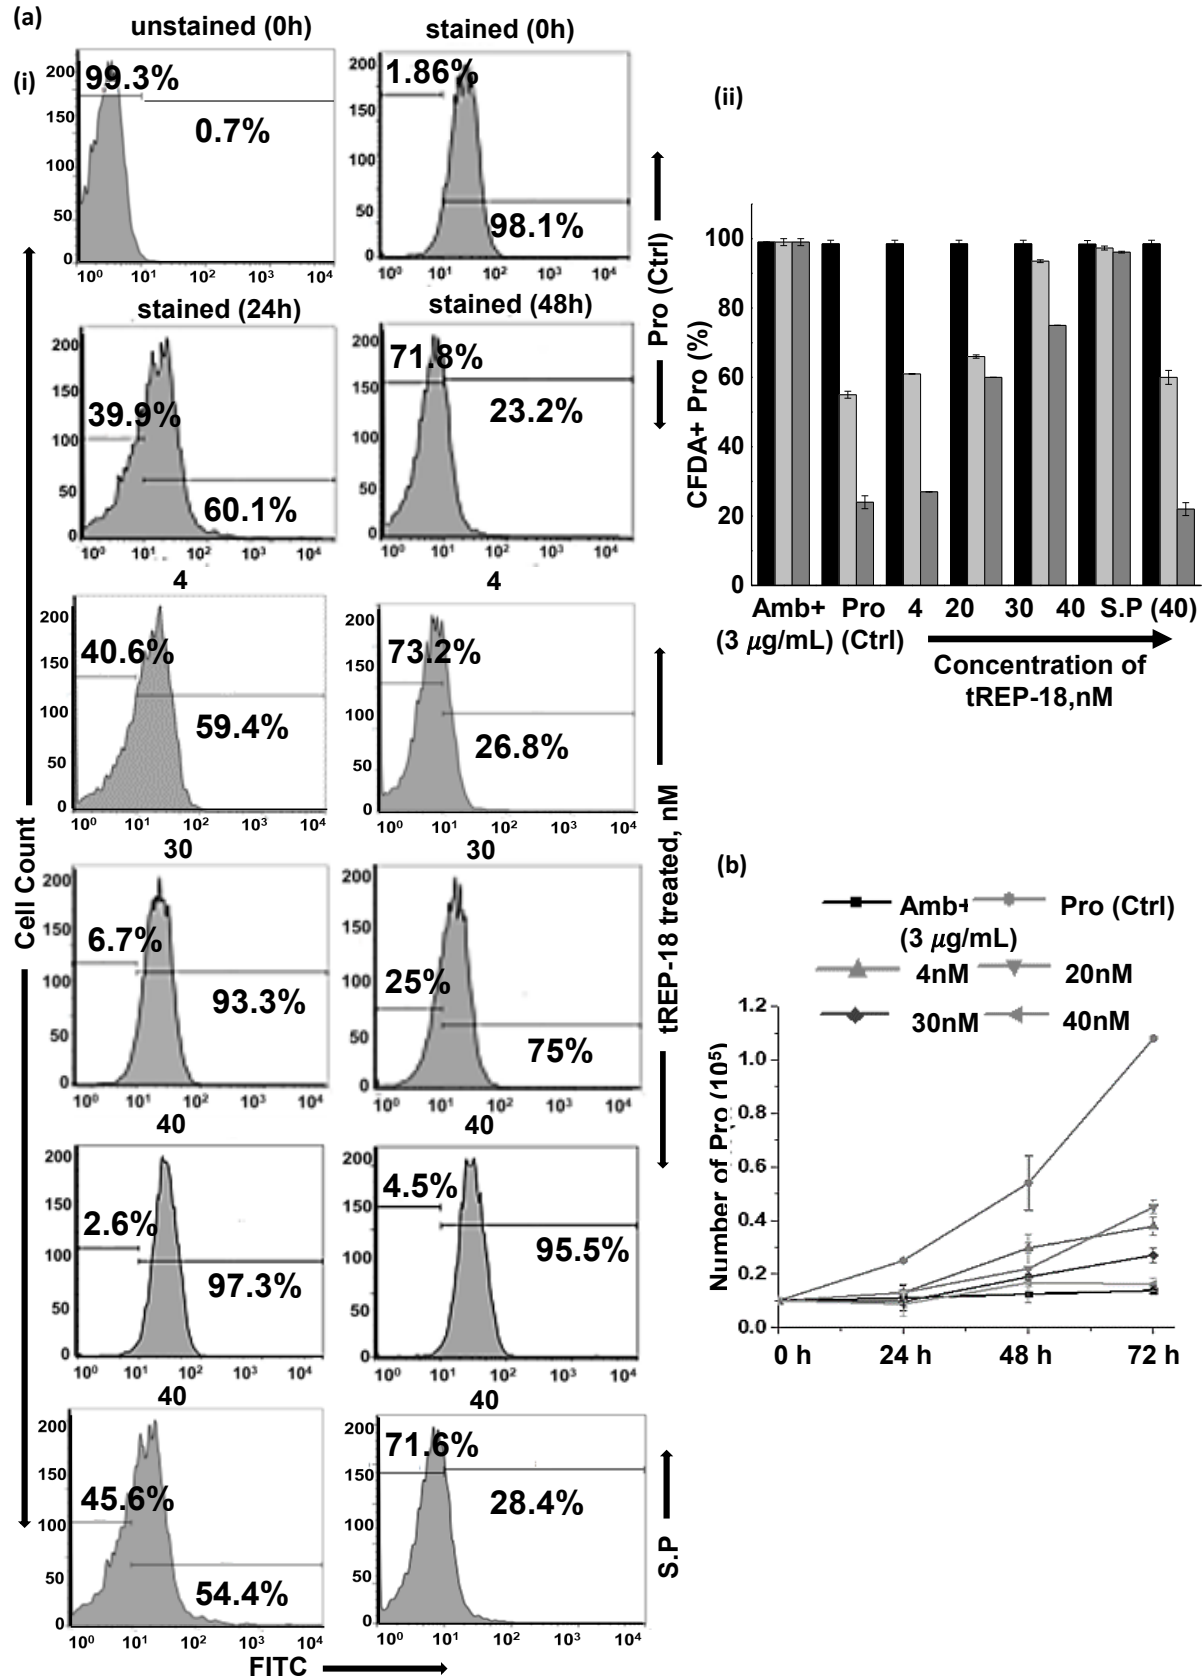

**Figure. 4**

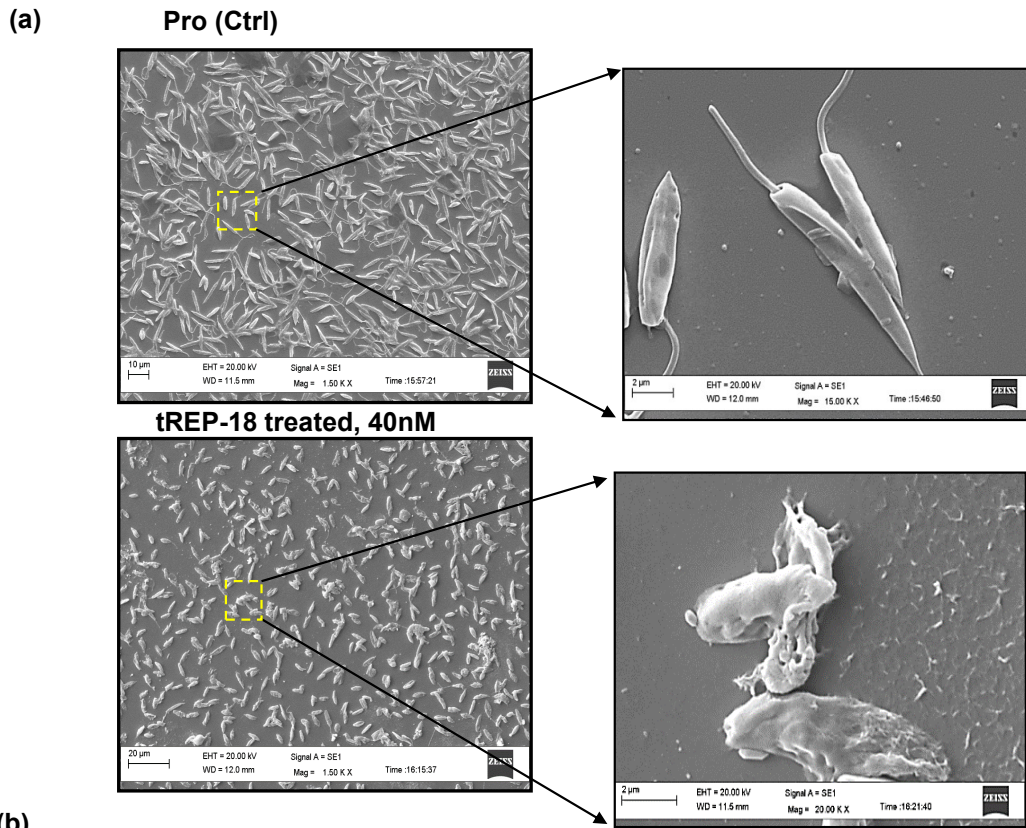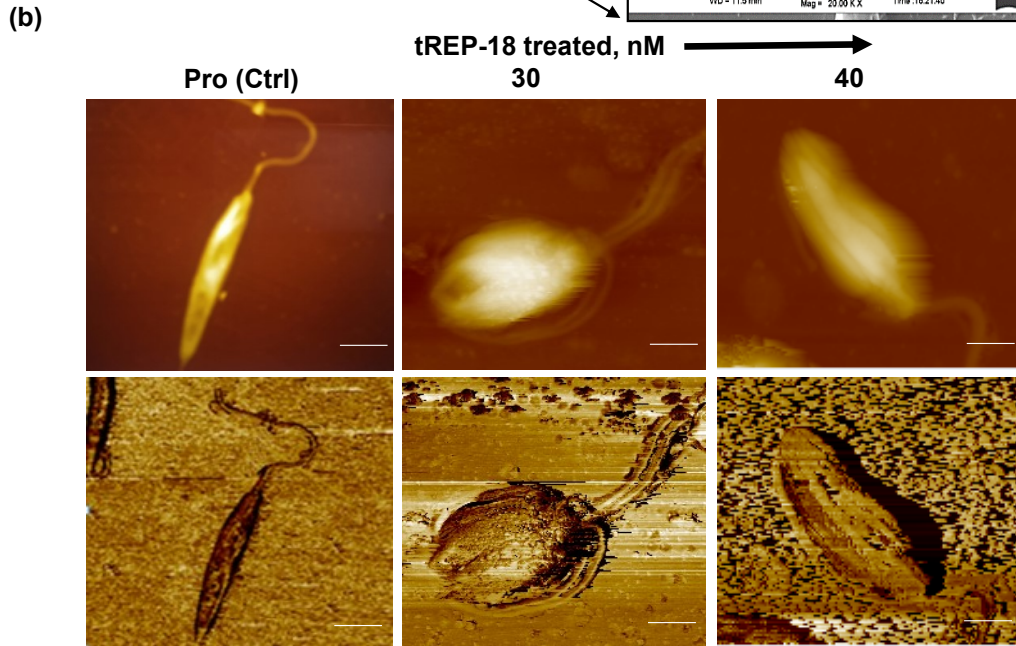

|                              | Length             | Width              | W/H Ratio      | RMS Roughness |
|------------------------------|--------------------|--------------------|----------------|---------------|
| <b>Pro (Ctrl)</b>            | <b>19 ± 2.32</b>   | <b>2.2 ± 0.873</b> | <b>0.11578</b> | <b>4.083</b>  |
| <b>tREP-18 treated, 30nM</b> | <b>10.7 ± 3.02</b> | <b>3.9 ± 0.563</b> | <b>0.333</b>   | <b>2.373</b>  |
| <b>tREP-18 treated, 40nM</b> | <b>6.1 ± 2.33</b>  | <b>2.4 ± 0.194</b> | <b>0.393</b>   | <b>1.323</b>  |

**Figure. 5**

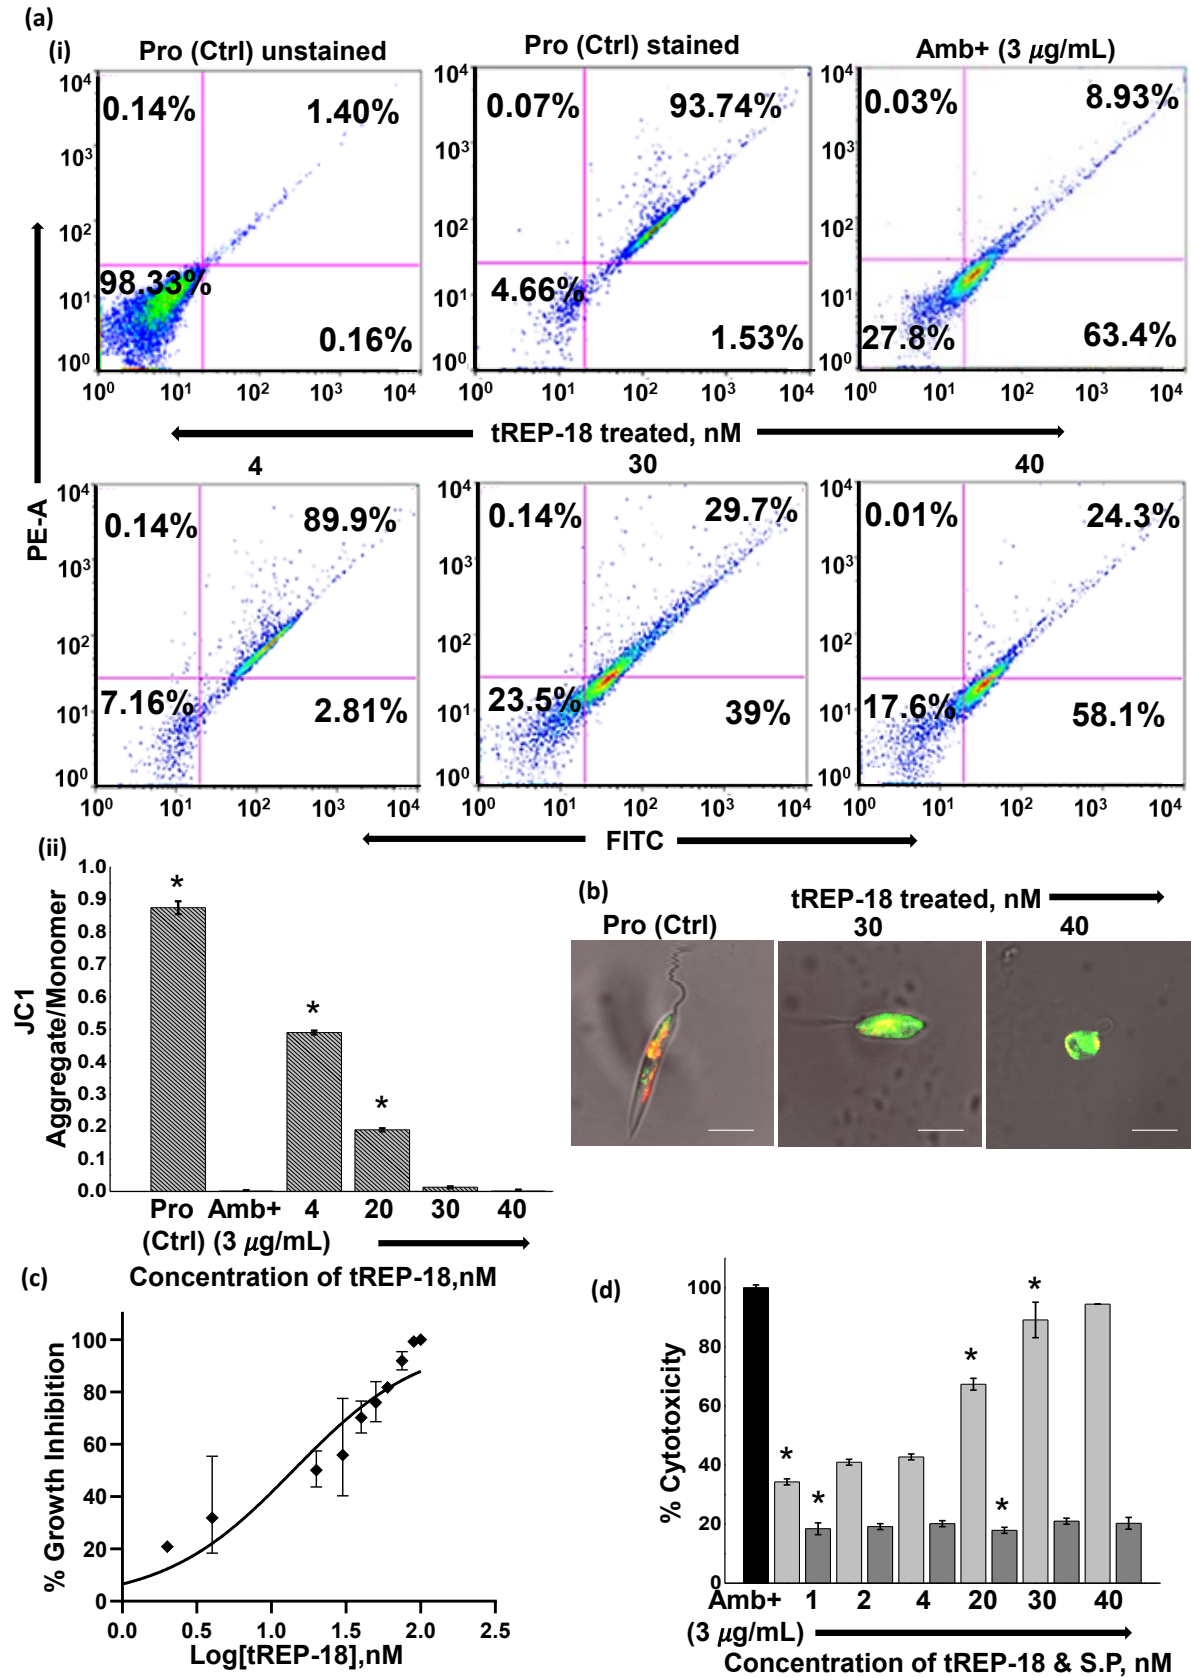

**Figure. 6**

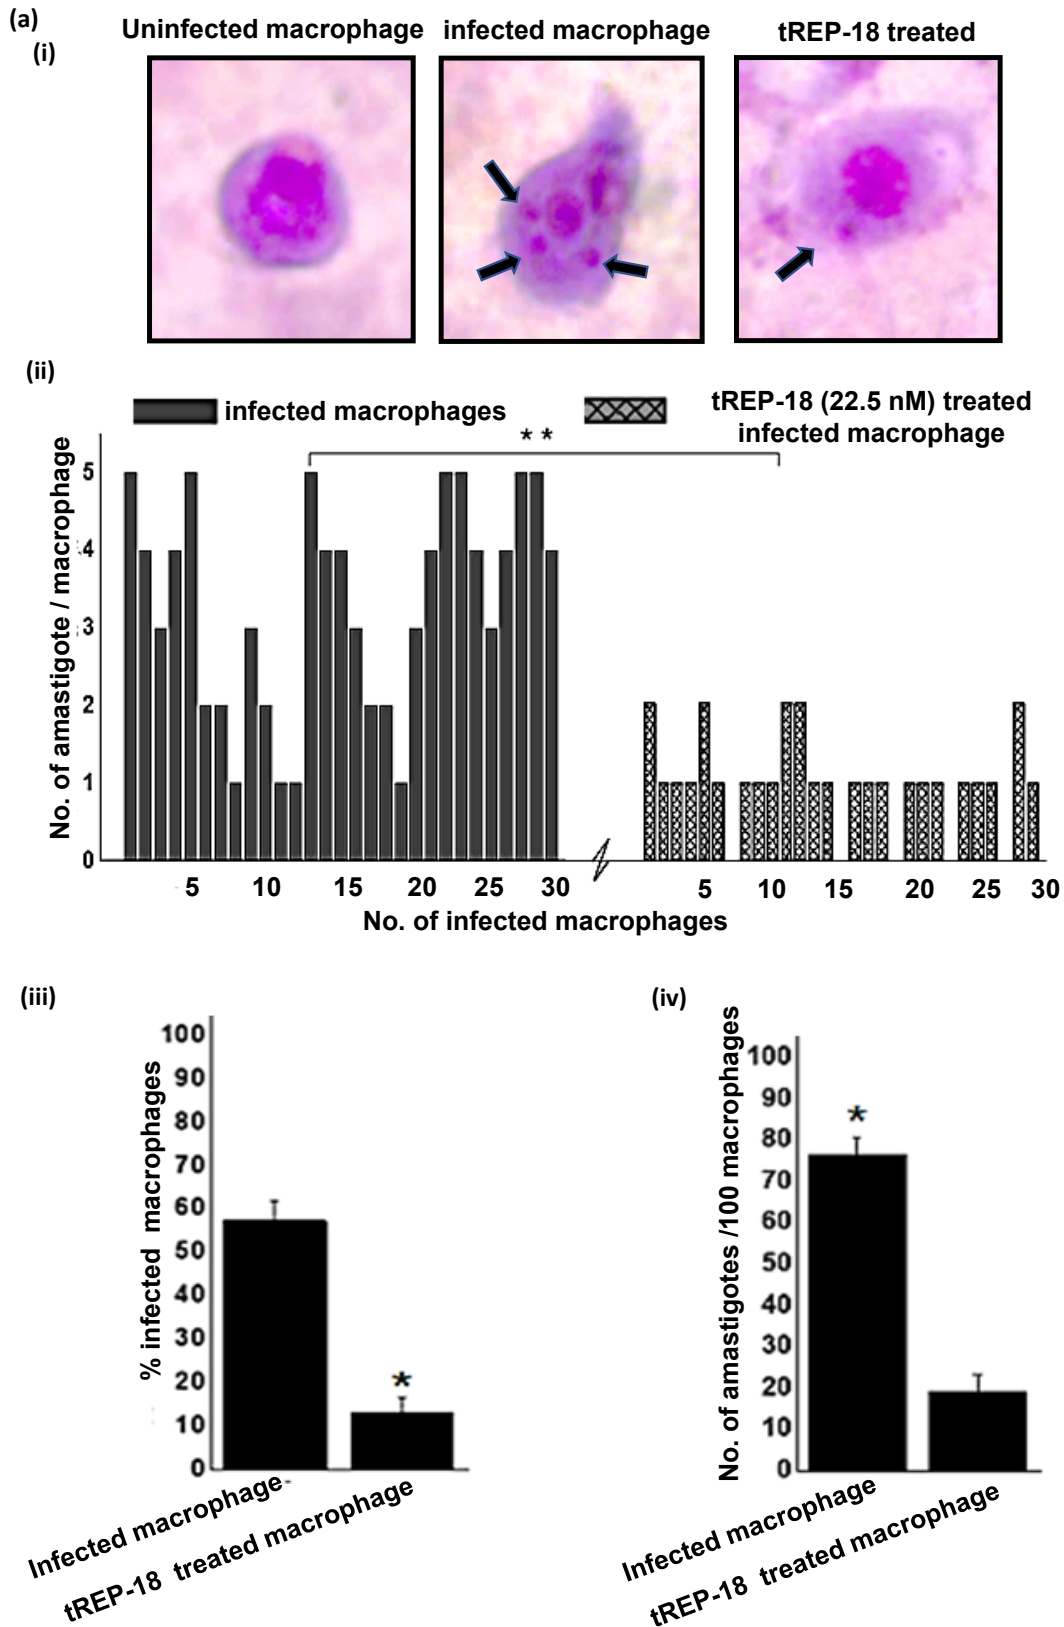

Figure. 7

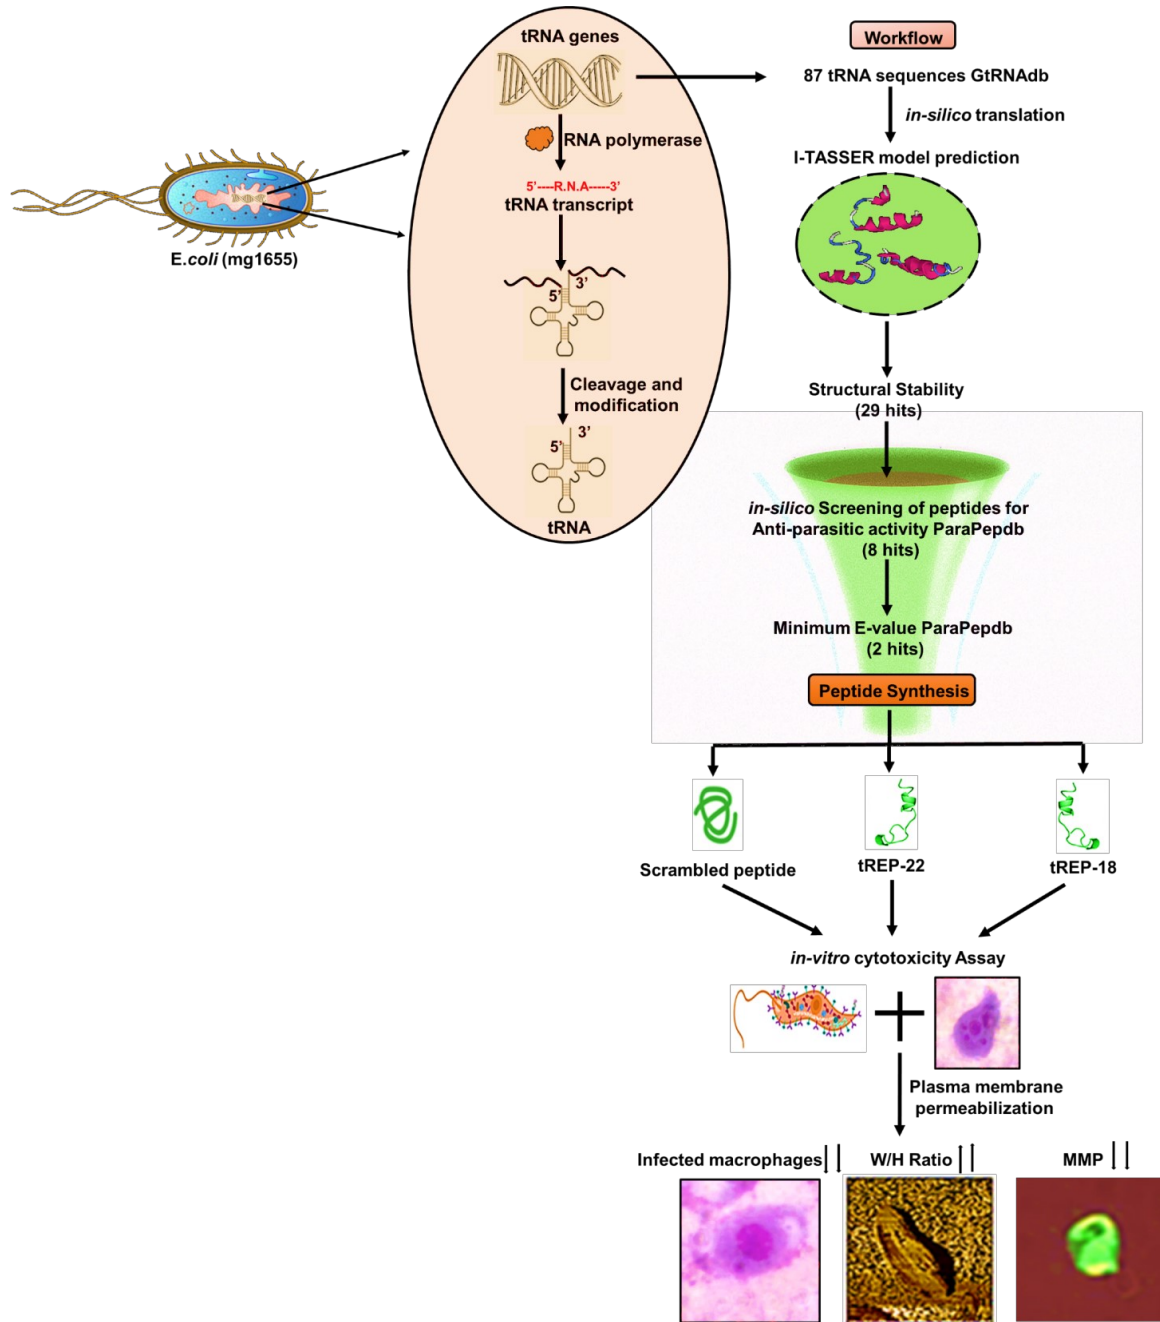

Source: https://www.biorxiv.org/content/10.1101/2020.10.04.325217v1.full.pdf
